# Supplementary material
Source: Elsevier journal article supplement (https://comptes-rendus.academie-sciences.fr/biologies/article/10.1016/j.crvi.2011.05.003/file/attach/mmc1.pdf)

## Supplementary data

**Table S1. Details of the specimens investigated in this study.**

| Species      | Localities in CAR  | Codes  | Haplotype / allele designation |             |                 |            | Accession no. |             |                     |
|--------------|--------------------|--------|--------------------------------|-------------|-----------------|------------|---------------|-------------|---------------------|
|              |                    |        | <i>COI</i>                     | <i>Cytb</i> | <i>COI-Cytb</i> | <i>FGB</i> | <i>COI</i>    | <i>Cytb</i> | <i>FGB</i>          |
| <i>E. g.</i> | Bangui             | T452   | h57                            | h79         | h91             | Eg1        | JF728623      | JF728746    | JF728388            |
| <i>E. g.</i> | Bangui             | T453   | h55                            | h74         | h86             | Eg1        | JF728624      | JF728747    | JF728389            |
| <i>E. g.</i> | Bangui             | T454   | h56                            | h78         | h90             | Eg1        | JF728625      | JF728748    | JF728392            |
| <i>E. g.</i> | Bangui             | T455   | h23                            | h80         | h92             | Eg1; Eg3   | JF728626      | JF728749    | JF728393 ; JF728394 |
| <i>E. g.</i> | Bangui             | T456   | h8                             | h76         | h88             | Eg1        | JF728627      | JF728750    | JF728386            |
| <i>E. g.</i> | Bangui             | T457   | h3                             | h73         | h85             | Eg1        | JF728628      | JF728751    | JF728387            |
| <i>E. g.</i> | Bangui             | T458   | h58                            | h81         | h93             | Eg1        | JF728629      | JF728752    | JF728390            |
| <i>E. g.</i> | Bangui             | T460   | h59                            | h82         | h94             | Eg1        | JF728630      | JF728753    | JF728395            |
| <i>E. g.</i> | Bangui             | T619   | h23                            | h80         | h92             | Eg1        | JF728633      | JF728756    | JF728396            |
| <i>E. g.</i> | Bangui             | T621   | h8                             | h76         | h88             | Eg1        | JF728634      | JF728757    | JF728391            |
| <i>E. g.</i> | Bangui             | R08004 | h54                            | h72         | h84             | Eg1        | JF728612      | JF728735    | JF728376            |
| <i>E. g.</i> | Bangui             | R08005 | h3                             | h73         | h85             | Eg1        | JF728613      | JF728736    | JF728377            |
| <i>E. g.</i> | Bangui             | R08007 | h55                            | h74         | h86             | Eg1        | JF728614      | JF728737    | JF728378            |
| <i>E. g.</i> | Bangui             | R08018 | h55                            | h74         | h86             | Eg1        | JF728615      | JF728738    | JF728379            |
| <i>E. g.</i> | Bangui             | R08199 | h3                             | h75         | h87             | Eg1; Eg2   | JF728616      | JF728739    | JF728380 ; JF728381 |
| <i>E. g.</i> | Bangui             | R08206 | h8                             | h76         | h88             | Eg1        | JF728617      | JF728740    | JF728382            |
| <i>E. g.</i> | Bangui             | R08207 | h55                            | h74         | h86             | Eg1        | JF728618      | JF728741    | JF728383            |
| <i>E. g.</i> | Bangui             | R08208 | h55                            | h74         | h86             | Eg1; Eg2   | JF728619      | JF728742    | JF728384 ; JF728385 |
| <i>E. g.</i> | Gbokila            | T462   | h60                            | h84         | h96             | Eg1        | JF728632      | JF728755    | JF728386            |
| <i>E. g.</i> | Pk28 road of Boali | T461   | h45                            | h83         | h95             | Eg1; Eg3   | JF728631      | JF728754    | JF728373 ; JF728374 |
| <i>E. g.</i> | Sakaï              | T192   | h23                            | h77         | h89             | Eg1        | JF728620      | JF728743    | JF728368            |
| <i>E. g.</i> | Sakaï              | T193   | h56                            | h78         | h90             | Eg1; Eg2   | JF728621      | JF728744    | JF728369 ; JF728370 |
| <i>E. g.</i> | Sakaï              | T194   | h23                            | h77         | h89             | Eg1; Eg2   | JF728622      | JF728745    | JF728371 ; JF728372 |
| <i>M. p.</i> | Bangui             | T202   | h20                            | h25         | h27             | Mp1        | JF728546      | JF728669    | JF728408            |
| <i>M. p.</i> | Bangui             | T211   | h21                            | h26         | h28             | Mp1        | JF728547      | JF728670    | JF728409            |
| <i>M. p.</i> | Bangui             | T213   | h22                            | h27         | h29             | Mp1        | JF728548      | JF728671    | JF728410            |
| <i>M. p.</i> | Bangui             | T217   | h23                            | h21         | h30             | Mp1        | JF728549      | JF728672    | JF728411            |
| <i>M. p.</i> | Bangui             | T220   | h24                            | h28         | h31             | Mp1        | JF728550      | JF728673    | JF728412            |
| <i>M. p.</i> | Bangui             | T222   | h1                             | h29         | h32             | Mp1        | JF728551      | JF728674    | JF728413            |
| <i>M. p.</i> | Bangui             | T226   | h7                             | h9          | h9              | Mp1; Mp5   | JF728552      | JF728675    | JF728414 ; JF728415 |
| <i>M. p.</i> | Bangui             | T228   | h25                            | h30         | h33             | Mp1        | JF728553      | JF728676    | JF728416            |
| <i>M. p.</i> | Bangui             | T229   | h3                             | h31         | h34             | Mp1        | JF728554      | JF728677    | JF728417            |
| <i>M. p.</i> | Bangui             | T464   | h8                             | h32         | h35             | Mp1        | JF728555      | JF728678    | JF728450            |
| <i>M. p.</i> | Bangui             | T465   | h17                            | h33         | h36             | Mp1        | JF728556      | JF728679    | JF728449            |
| <i>M. p.</i> | Bangui             | T466   | h17                            | h34         | h37             | Mp1; Mp14  | JF728557      | JF728680    | JF728403 ; JF728404 |
| <i>M. p.</i> | Bangui             | T467   | h3                             | h35         | h38             | Mp1        | JF728558      | JF728681    | JF728452            |
| <i>M. p.</i> | Bangui             | T468   | h26                            | h36         | h39             | Mp1        | JF728559      | JF728682    | JF728453            |
| <i>M. p.</i> | Bangui             | T469   | h3                             | h37         | h40             | Mp1        | JF728560      | JF728683    | JF728454            |
| <i>M. p.</i> | Bangui             | T470   | h27                            | h38         | h41             | Mp1        | JF728561      | JF728684    | JF728455            |
| <i>M. p.</i> | Bangui             | T471   | h28                            | h39         | h42             | Mp1        | JF728562      | JF728685    | JF728456            |
| <i>M. p.</i> | Bangui             | T472   | h3                             | h7          | h7              | Mp1        | JF728563      | JF728686    | JF728457            |
| <i>M. p.</i> | Bangui             | T473   | h3                             | h40         | h43             | Mp1        | JF728564      | JF728687    | JF728470            |
| <i>M. p.</i> | Bangui             | T474   | h17                            | h41         | h44             | Mp1        | JF728565      | JF728688    | JF728458            |
| <i>M. p.</i> | Bangui             | T475   | h29                            | h42         | h45             | Mp1        | JF728566      | JF728689    | JF728459            |
| <i>M. p.</i> | Bangui             | T477   | h30                            | h43         | h46             | Mp1; Mp7   | JF728567      | JF728690    | JF728460 ; JF728461 |
| <i>M. p.</i> | Bangui             | T478   | h31                            | h44         | h47             | Mp1        | JF728568      | JF728691    | JF728462            |

|              |        |        |     |     |     |           |          |          |                     |
|--------------|--------|--------|-----|-----|-----|-----------|----------|----------|---------------------|
| <i>M. p.</i> | Bangui | T479   | h32 | h45 | h48 | Mp1       | JF728569 | JF728692 | JF728471            |
| <i>M. p.</i> | Bangui | T480   | h33 | h46 | h49 | Mp1       | JF728570 | JF728693 | JF728463            |
| <i>M. p.</i> | Bangui | T481   | h5  | h47 | h50 | Mp3       | JF728571 | JF728694 | JF728464            |
| <i>M. p.</i> | Bangui | T620   | h36 | h7  | h57 | Mp1       | JF728579 | JF728702 | JF728476            |
| <i>M. p.</i> | Bangui | T622   | h37 | h6  | h58 | Mp1       | JF728580 | JF728703 | JF728477            |
| <i>M. p.</i> | Bangui | T623   | h5  | h53 | h59 | Mp1       | JF728581 | JF728704 | JF728478            |
| <i>M. p.</i> | Bangui | T624   | h38 | h54 | h60 | Mp1       | JF728582 | JF728705 | JF728479            |
| <i>M. p.</i> | Bangui | T625   | h39 | h55 | h61 | Mp1       | JF728583 | JF728706 | JF728480            |
| <i>M. p.</i> | Bangui | T626   | h40 | h5  | h62 | Mp1; Mp9  | JF728584 | JF728707 | JF728481 ; JF728482 |
| <i>M. p.</i> | Bangui | T627   | h41 | h56 | h63 | Mp1       | JF728585 | JF728708 | JF728483            |
| <i>M. p.</i> | Bangui | T628   | h6  | h57 | h64 | Mp1       | JF728586 | JF728709 | JF728484            |
| <i>M. p.</i> | Bangui | T629   | h42 | h58 | h65 | Mp1       | JF728587 | JF728710 | JF728485            |
| <i>M. p.</i> | Bangui | T630   | h43 | h59 | h66 | Mp1; Mp14 | JF728588 | JF728711 | JF728399 ; JF728400 |
| <i>M. p.</i> | Bangui | T631   | h3  | h60 | h67 | Mp1       | JF728589 | JF728712 | JF728475            |
| <i>M. p.</i> | Bangui | T632   | h44 | h61 | h68 | Mp1; Mp9  | JF728590 | JF728713 | JF728486 ; JF728487 |
| <i>M. p.</i> | Bangui | T633   | h45 | h62 | h69 | Mp1       | JF728591 | JF728714 | JF728488            |
| <i>M. p.</i> | Bangui | T634   | h5  | h7  | h70 | Mp1       | JF728592 | JF728715 | JF728489            |
| <i>M. p.</i> | Bangui | T636   | h46 | h6  | h71 | Mp1       | JF728593 | JF728716 | JF728490            |
| <i>M. p.</i> | Bangui | T637   | h5  | h63 | h72 | Mp1       | JF728594 | JF728717 | JF728491            |
| <i>M. p.</i> | Bangui | T638   | h47 | h64 | h73 | Mp2       | JF728595 | JF728718 | JF728492            |
| <i>M. p.</i> | Bangui | T639   | h48 | h7  | h74 | Mp1       | JF728596 | JF728719 | JF728493            |
| <i>M. p.</i> | Bangui | T640   | h49 | h65 | h75 | Mp1       | JF728597 | JF728720 | JF728472            |
| <i>M. p.</i> | Bangui | T642   | h8  | h55 | h76 | Mp1       | JF728598 | JF728721 | JF728494            |
| <i>M. p.</i> | Bangui | T643   | h26 | h36 | h39 | Mp1; Mp10 | JF728599 | JF728722 | JF728495 ; JF728496 |
| <i>M. p.</i> | Bangui | T644   | h3  | h7  | h7  | Mp1; Mp9  | JF728600 | JF728723 | JF728497 ; JF728498 |
| <i>M. p.</i> | Bangui | T645   | h50 | h66 | h77 | Mp1       | JF728601 | JF728724 | JF728499            |
| <i>M. p.</i> | Bangui | T646   | h3  | h35 | h38 | Mp1       | JF728602 | JF728725 | JF728500            |
| <i>M. p.</i> | Bangui | T647   | h5  | h5  | h5  | Mp1       | JF728603 | JF728726 | JF728501            |
| <i>M. p.</i> | Bangui | T648   | h25 | h67 | h78 | Mp1       | JF728604 | JF728727 | JF728502            |
| <i>M. p.</i> | Bangui | T649   | h51 | h68 | h79 | Mp1       | JF728605 | JF728728 | JF728503            |
| <i>M. p.</i> | Bangui | T650   | h23 | h69 | h80 | Mp1       | JF728606 | JF728729 | JF728504            |
| <i>M. p.</i> | Bangui | T651   | h17 | h70 | h81 | Mp1       | JF728607 | JF728730 | JF728505            |
| <i>M. p.</i> | Bangui | T652   | h52 | h71 | h82 | Mp1; Mp9  | JF728608 | JF728731 | JF728506 ; JF728507 |
| <i>M. p.</i> | Bangui | T653   | h3  | h20 | h22 | Mp1       | JF728609 | JF728732 | JF728508            |
| <i>M. p.</i> | Bangui | T654   | h3  | h35 | h38 | Mp1       | JF728610 | JF728733 | JF728509            |
| <i>M. p.</i> | Bangui | T655   | h53 | h7  | h83 | Mp1       | JF728611 | JF728734 | JF728510            |
| <i>M. p.</i> | Bangui | R08001 | h1  | h1  | h1  | Mp1       | JF728515 | JF728638 | JF728418            |
| <i>M. p.</i> | Bangui | R08002 | h2  | h2  | h2  | Mp1       | JF728516 | JF728639 | JF728419            |
| <i>M. p.</i> | Bangui | R08003 | h2  | h2  | h2  | Mp1       | JF728517 | JF728640 | JF728420            |
| <i>M. p.</i> | Bangui | R08006 | h3  | h3  | h3  | Mp1; Mp6  | JF728518 | JF728641 | JF728421 ; JF728422 |
| <i>M. p.</i> | Bangui | R08008 | h4  | h4  | h4  | Mp1       | JF728519 | JF728642 | JF728423            |
| <i>M. p.</i> | Bangui | R08009 | h5  | h5  | h5  | Mp1       | JF728520 | JF728643 | JF728424            |
| <i>M. p.</i> | Bangui | R08010 | h6  | h6  | h6  | Mp1; Mp4  | JF728521 | JF728644 | JF728425 ; JF728426 |
| <i>M. p.</i> | Bangui | R08011 | h3  | h7  | h7  | Mp1       | JF728522 | JF728645 | JF728427            |
| <i>M. p.</i> | Bangui | R08012 | h14 | h8  | h8  | Mp1; Mp14 | JF728538 | JF728646 | JF728405 ; JF728406 |
| <i>M. p.</i> | Bangui | R08013 | h7  | h9  | h9  | Mp1       | JF728523 | JF728647 | JF728428            |
| <i>M. p.</i> | Bangui | R08016 | h8  | h10 | h10 | Mp1       | JF728524 | JF728648 | JF728429            |
| <i>M. p.</i> | Bangui | R08017 | h14 | h8  | h8  | Mp1       | JF728537 | JF728649 | JF728430            |
| <i>M. p.</i> | Bangui | R08197 | h9  | h11 | h11 | Mp1       | JF728525 | JF728650 | JF728431            |
| <i>M. p.</i> | Bangui | R08198 | h3  | h7  | h7  | Mp1       | JF728526 | JF728651 | JF728432            |
| <i>M. p.</i> | Bangui | R08200 | h10 | h12 | h12 | Mp1       | JF728527 | JF728652 | JF728433            |
| <i>M. p.</i> | Bangui | R08201 | h10 | h13 | h13 | Mp1       | JF728528 | JF728653 | JF728434            |
| <i>M. p.</i> | Bangui | R08203 | h3  | h14 | h14 | Mp1       | JF728529 | JF728654 | JF728435            |
| <i>M. p.</i> | Bangui | R08204 | h3  | h15 | h15 | Mp1       | JF728530 | JF728655 | JF728436            |
| <i>M. p.</i> | Bangui | R08209 | h3  | h7  | h7  | Mp1       | JF728531 | JF728656 | JF728437            |

|              |                    |        |     |     |     |           |          |          |                     |
|--------------|--------------------|--------|-----|-----|-----|-----------|----------|----------|---------------------|
| <i>M. p.</i> | Bangui             | R08266 | h18 | h23 | h25 | Mp1       | JF728544 | JF728667 | JF728448            |
| <i>M. p.</i> | Nguerengou         | R08242 | h11 | h16 | h16 | Mp1       | JF728532 | JF728657 | JF728438            |
| <i>M. p.</i> | Nguerengou         | R08243 | h8  | h17 | h17 | Mp8; Mp11 | JF728533 | JF728658 | JF728439 ; JF728440 |
| <i>M. p.</i> | Nguerengou         | R08244 | h14 | h18 | h18 | Mp1       | JF728536 | JF728659 | JF728441            |
| <i>M. p.</i> | Nguerengou         | R08245 | h12 | h7  | h19 | Mp1; Mp14 | JF728534 | JF728660 | JF728397 ; JF728398 |
| <i>M. p.</i> | Nguerengou         | R08246 | h13 | h19 | h20 | Mp1       | JF728535 | JF728661 | JF728442            |
| <i>M. p.</i> | Nguerengou         | R08247 | h15 | h18 | h21 | Mp1       | JF728539 | JF728662 | JF728443            |
| <i>M. p.</i> | Nguerengou         | R08251 | h3  | h20 | h22 | Mp1       | JF728540 | JF728663 | JF728444            |
| <i>M. p.</i> | Nguerengou         | R08252 | h8  | h17 | h17 | Mp1       | JF728541 | JF728664 | JF728445            |
| <i>M. p.</i> | Nguerengou         | R08253 | h16 | h21 | h23 | Mp1       | JF728542 | JF728665 | JF728446            |
| <i>M. p.</i> | Nguerengou         | R08254 | h17 | h22 | h24 | Mp1       | JF728543 | JF728666 | JF728447            |
| <i>M. p.</i> | Pk28 road of Boali | T558   | h35 | h7  | h54 | Mp1       | JF728576 | JF728699 | JF728451            |
| <i>M. p.</i> | Pk45 road of Boali | T482   | h34 | h48 | h51 | Mp1; Mp13 | JF728572 | JF728695 | JF728465 ; JF728466 |
| <i>M. p.</i> | Pk45 road of Boali | T483   | h3  | h49 | h52 | Mp1       | JF728573 | JF728696 | JF728467            |
| <i>M. p.</i> | Pk45 road of Boali | T485   | h22 | h50 | h53 | Mp1       | JF728574 | JF728697 | JF728468            |
| <i>M. p.</i> | Pk45 road of Boali | T487   | h11 | h16 | h16 | Mp1       | JF728575 | JF728698 | JF728469            |
| <i>M. p.</i> | Pk45 road of Boali | T567   | h17 | h51 | h55 | Mp1; Mp14 | JF728577 | JF728700 | JF728401 ; JF728402 |
| <i>M. p.</i> | Pk45 road of Boali | T618   | h32 | h52 | h56 | Mp8; Mp10 | JF728578 | JF728701 | JF728473 ; JF728474 |
| <i>M. p.</i> | Sakaï              | T198   | h19 | h24 | h26 | Mp1       | JF728545 | JF728668 | JF728407            |

Abbreviations: *E. g.*= *Epomophorus gambianus*; *M. p.*= *Micropteropus pusillus*.

**Table S2. Intraspecific divergence calculated using Kimura 2-parameter distances for several Southeast Asian and Melanesian fruit bat species (COI sequences were extracted from BOLD; <http://www.boldsystems.org>).**

| Species                          | Specimens | Distances (%) |      |
|----------------------------------|-----------|---------------|------|
|                                  |           | min.          | max. |
| <i>Melonycteris woodfordi</i>    | 7         | 0             | 0.9  |
| <i>Pteropus lylei</i>            | 6         | 0             | 1.2  |
| <i>Eonycteris spelaea</i>        | 18        | 0             | 1.3  |
| <i>Sphaerias blandfordi</i>      | 22        | 0             | 1.4  |
| <i>Rousettus leschenaultii</i>   | 21        | 0             | 1.6  |
| <i>Megaerops niphanae</i>        | 37        | 0             | 1.7  |
| <i>Aethalops alecto</i>          | 16        | 0             | 1.7  |
| <i>Cynopterus sphinx</i>         | 32        | 0             | 2.3  |
| <i>Cynopterus brachyotis</i>     | 7         | 0             | 2.4  |
| <i>Rousettus amplexicaudatus</i> | 9         | 0             | 2.6  |
| <i>Pentethor lucasi</i> *        | 22        | 0             | 5.5  |
| <i>Melonycteris melanops</i> °   | 6         | 0             | 7.3  |
| <i>Balionycteris maculata</i> *  | 17        | 0             | 14.6 |

\* Species distributed on mainland and several islands in Southeast Asia

° Species distributed on several islands of Bismarck Archipelago in northern Melanesia

**Table S3. Intraspecific divergence calculated using Kimura 2-parameter distances for several fruit bat species** (*Cytb* sequences were extracted from NCBI;

<http://www.ncbi.nlm.nih.gov/>).

| Species                        | Specimens | Distances (%) |      |
|--------------------------------|-----------|---------------|------|
|                                |           | min.          | max. |
| <i>Rousettus leschenaultii</i> | 31        | 0             | 1.5  |
| <i>Eonycteris spelaea</i>      | 5         | 0             | 2.1  |
| <i>Cynopterus horsfieldi</i>   | 32        | 0             | 5.0  |

**Figure S1. Bayesian tree obtained from the analysis of the *Cytb* gene.**

The value on the branches indicate posterior probabilities (>0.75).

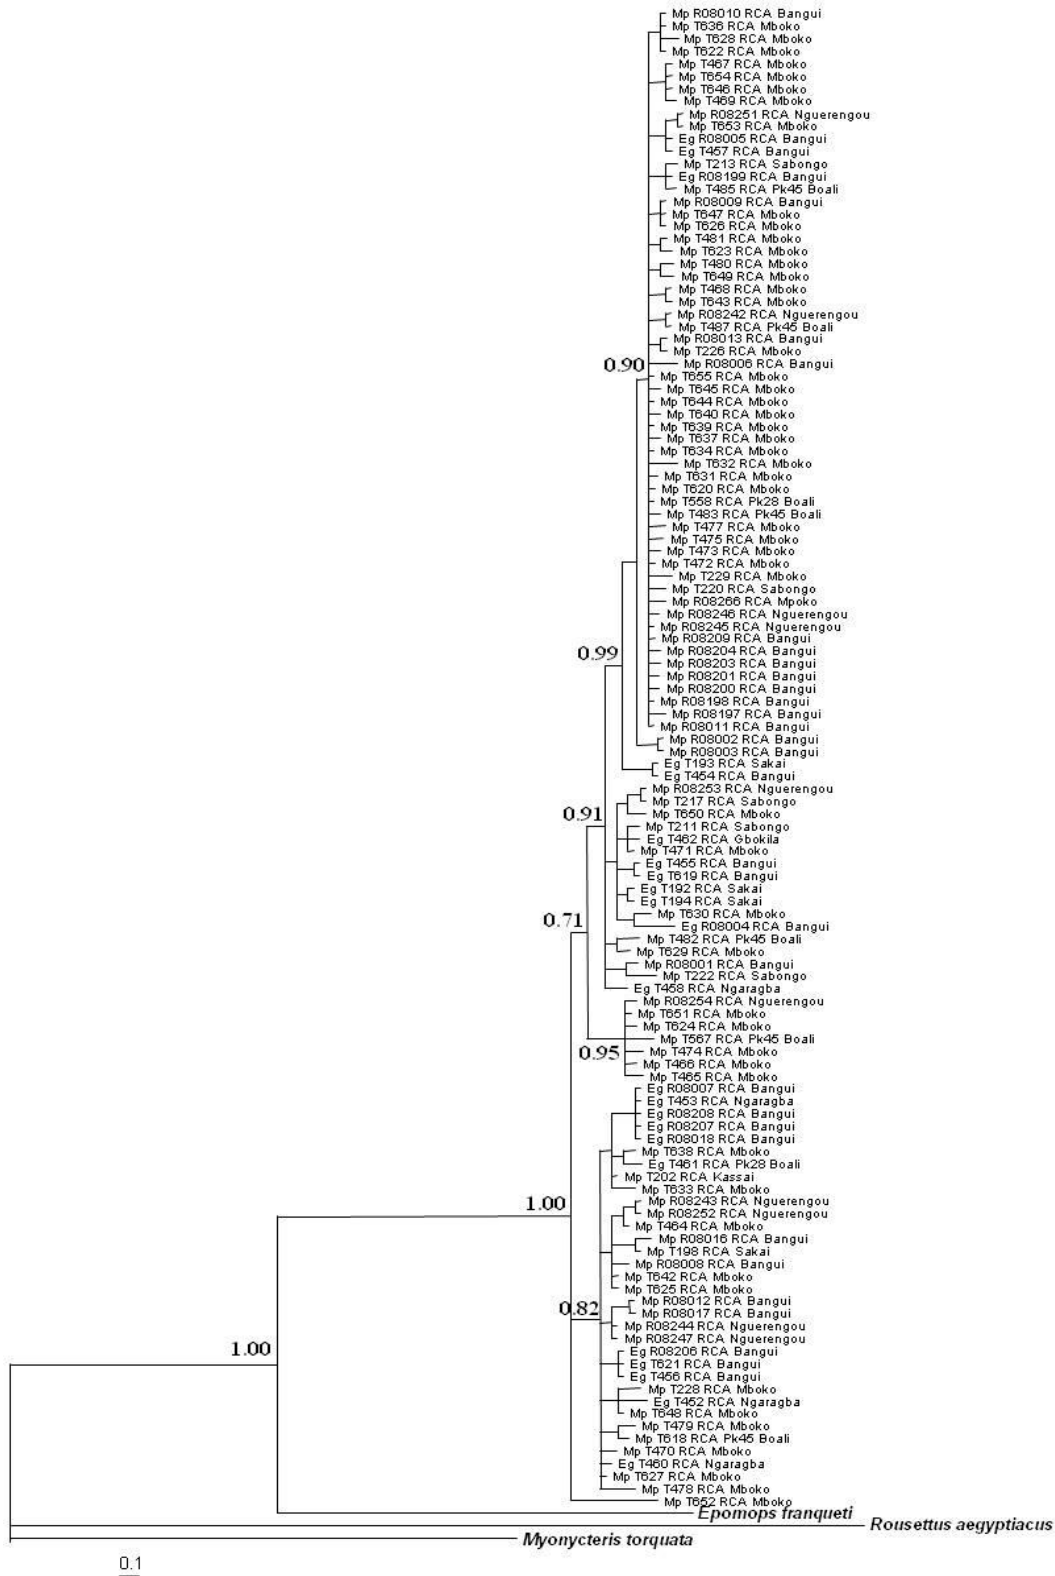

Figure S2. Bayesian tree obtained from the analysis of the *Cytb* gene with sequence of *E. wahlbergi*.

The values on the branches indicate posterior probabilities (>0.75).

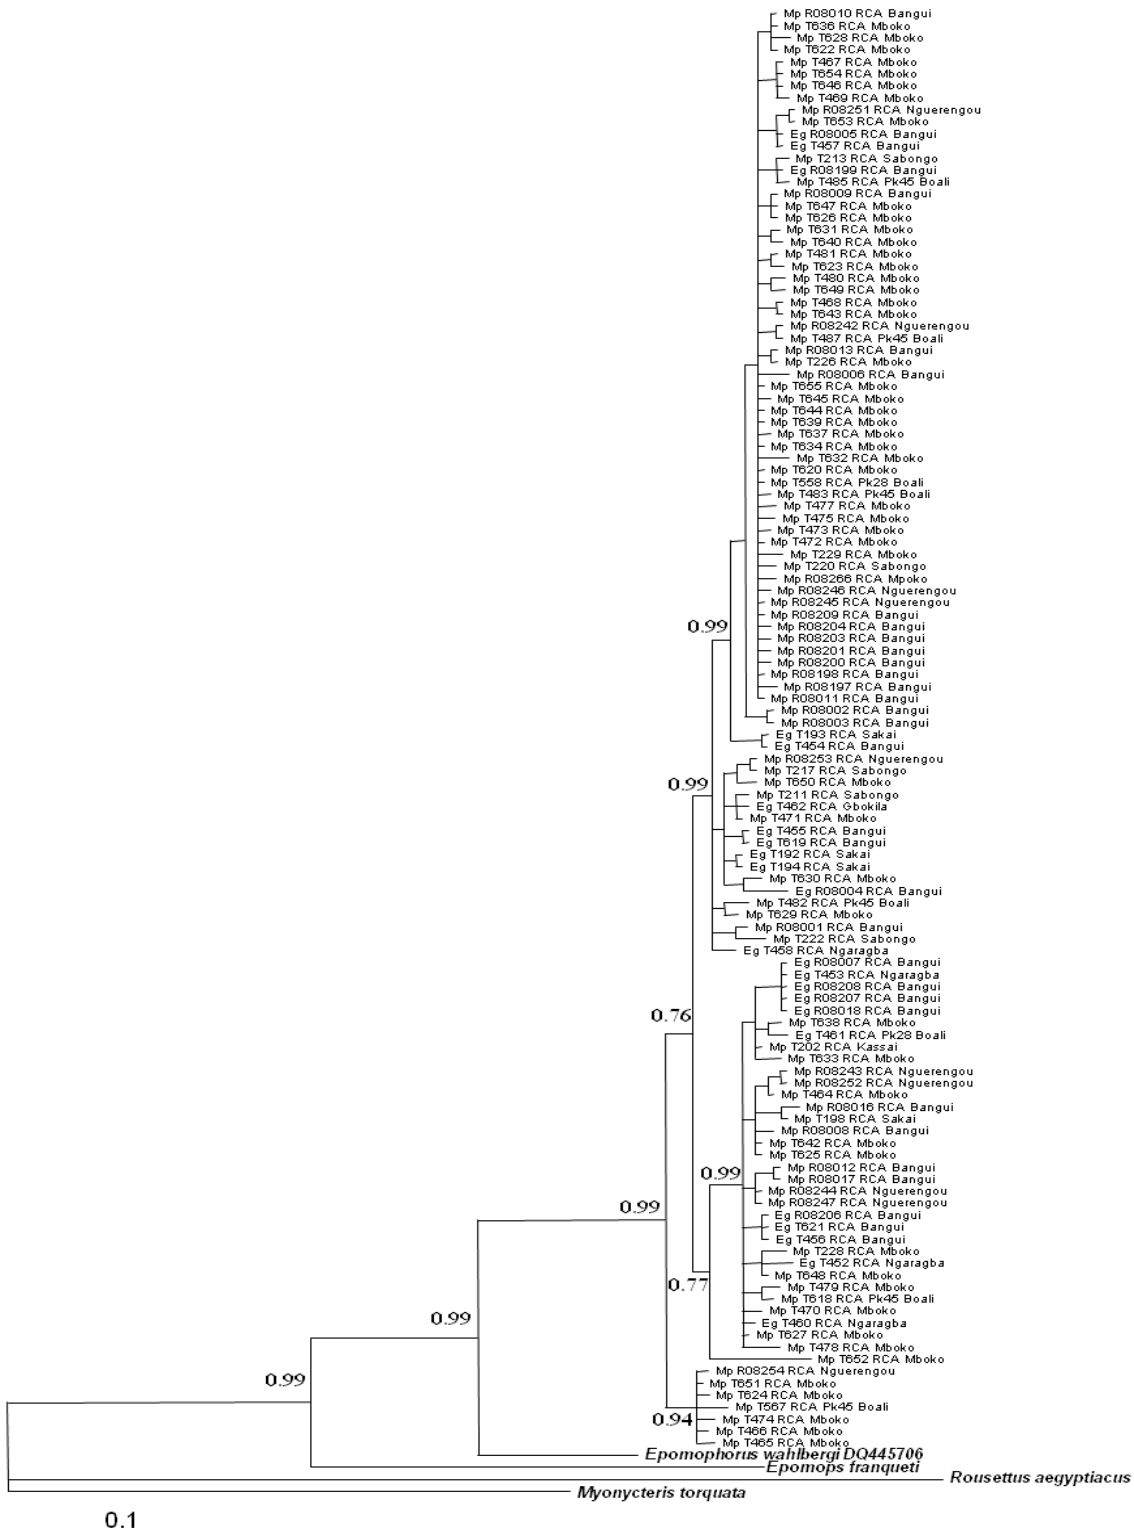

**Figure S3. Bayesian tree obtained from the analysis of the *COI* gene.**

The values on the branches indicate posterior probabilities (>0.75).

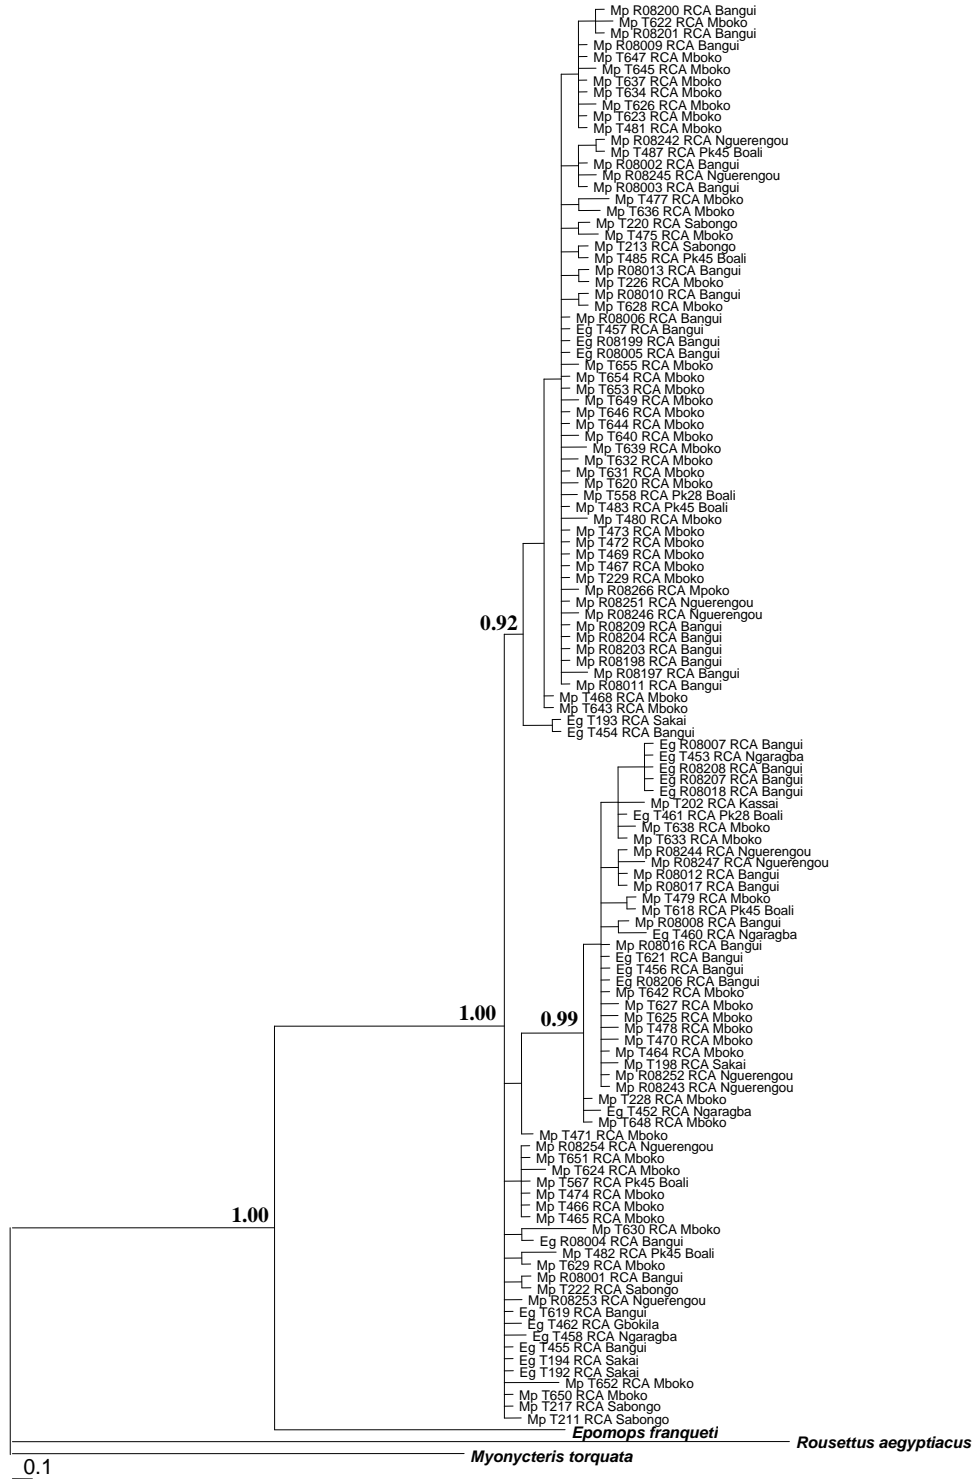



Figure S4. Median-joining network obtained from the analysis of the *Cytb* gene.

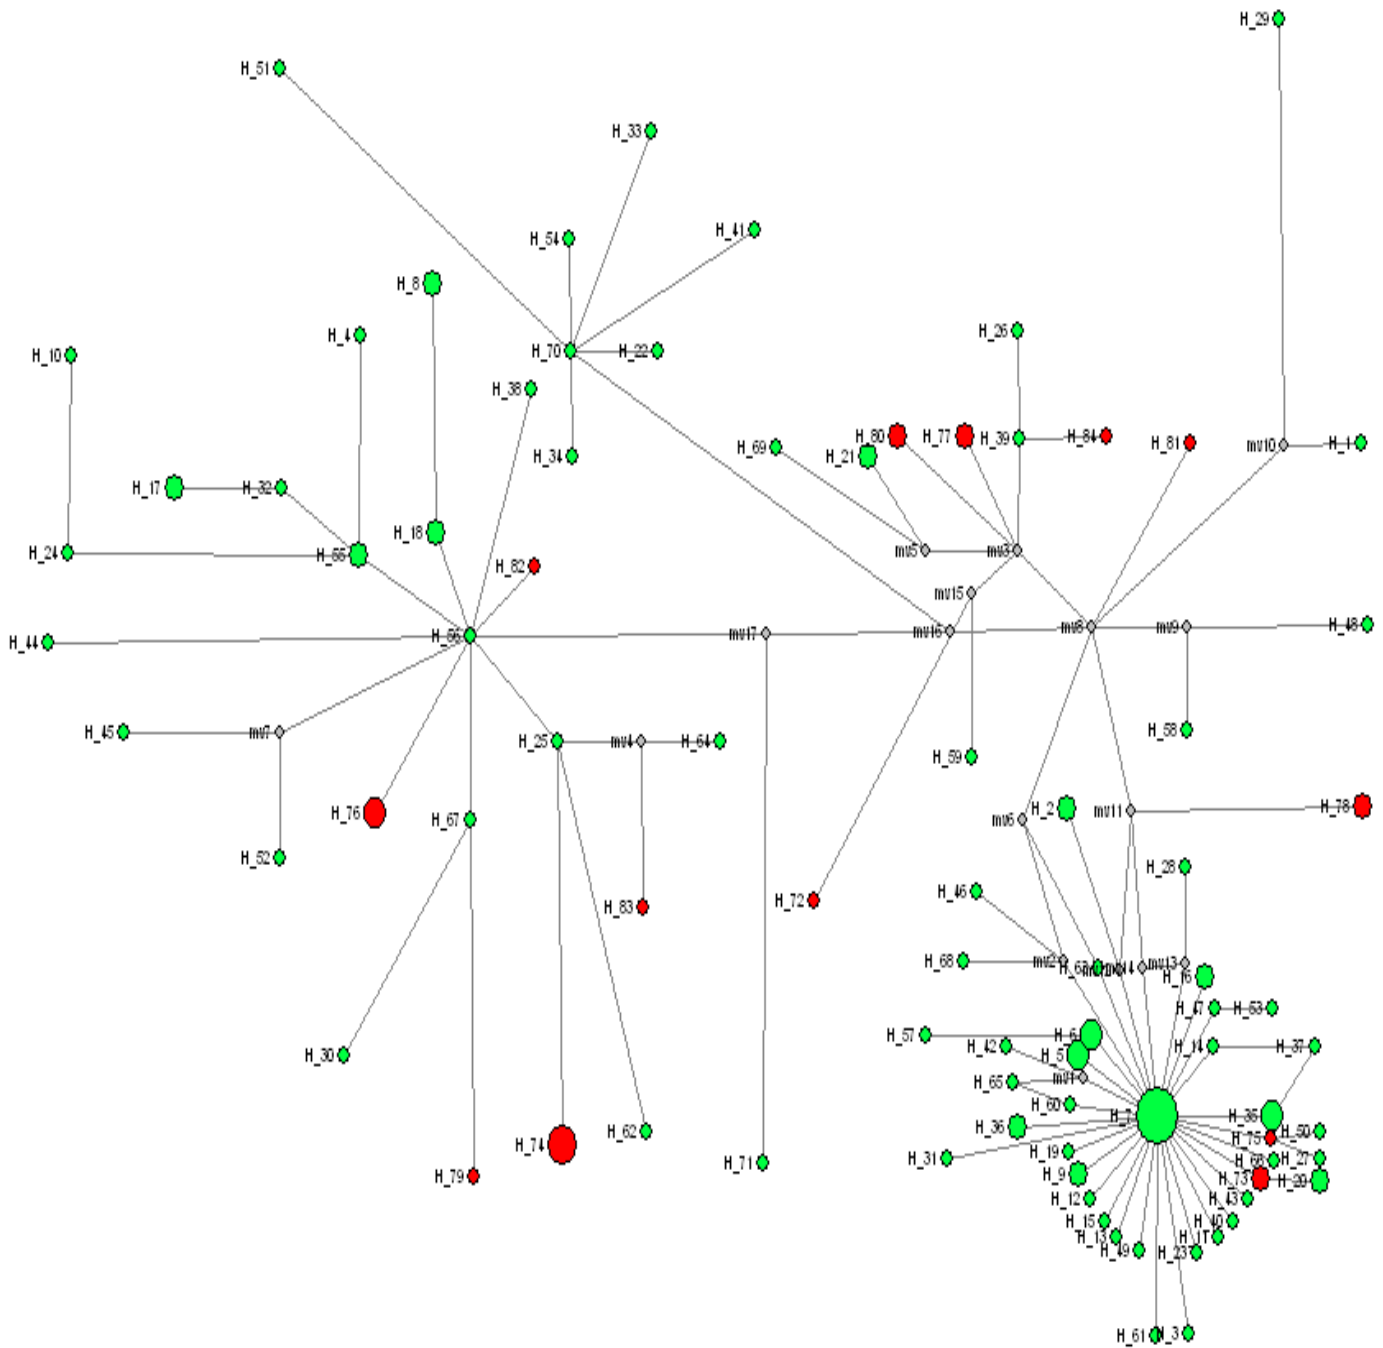

Figure S5. Median-joining network obtained from the analysis of the *COI* gene.

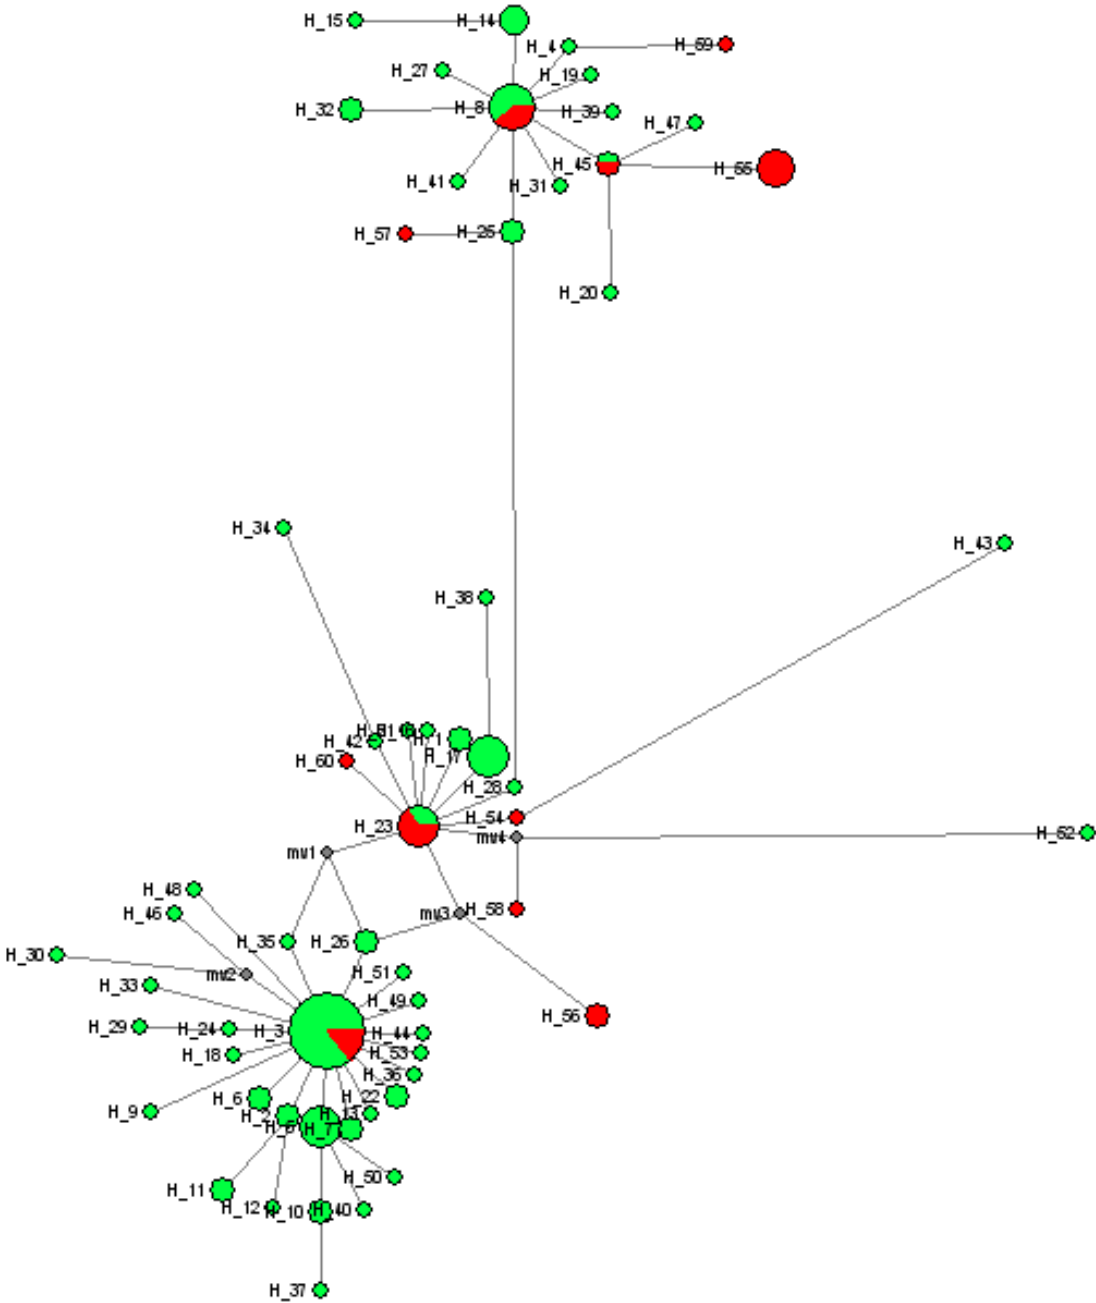

Supplement: mmc1 [file mmc1.pdf]
